# Supplementary material for: Synaptic m1A remodeling in the mPFC promotes fear extinction via Pten regulation
Source: Research Square preprint supplement (doi:10.21203/rs.3.rs-7703002/v1), 2025-10-03
Supplement: Supplementary file 1 [file 358dee7af330b6a3ffee7d80.docx]

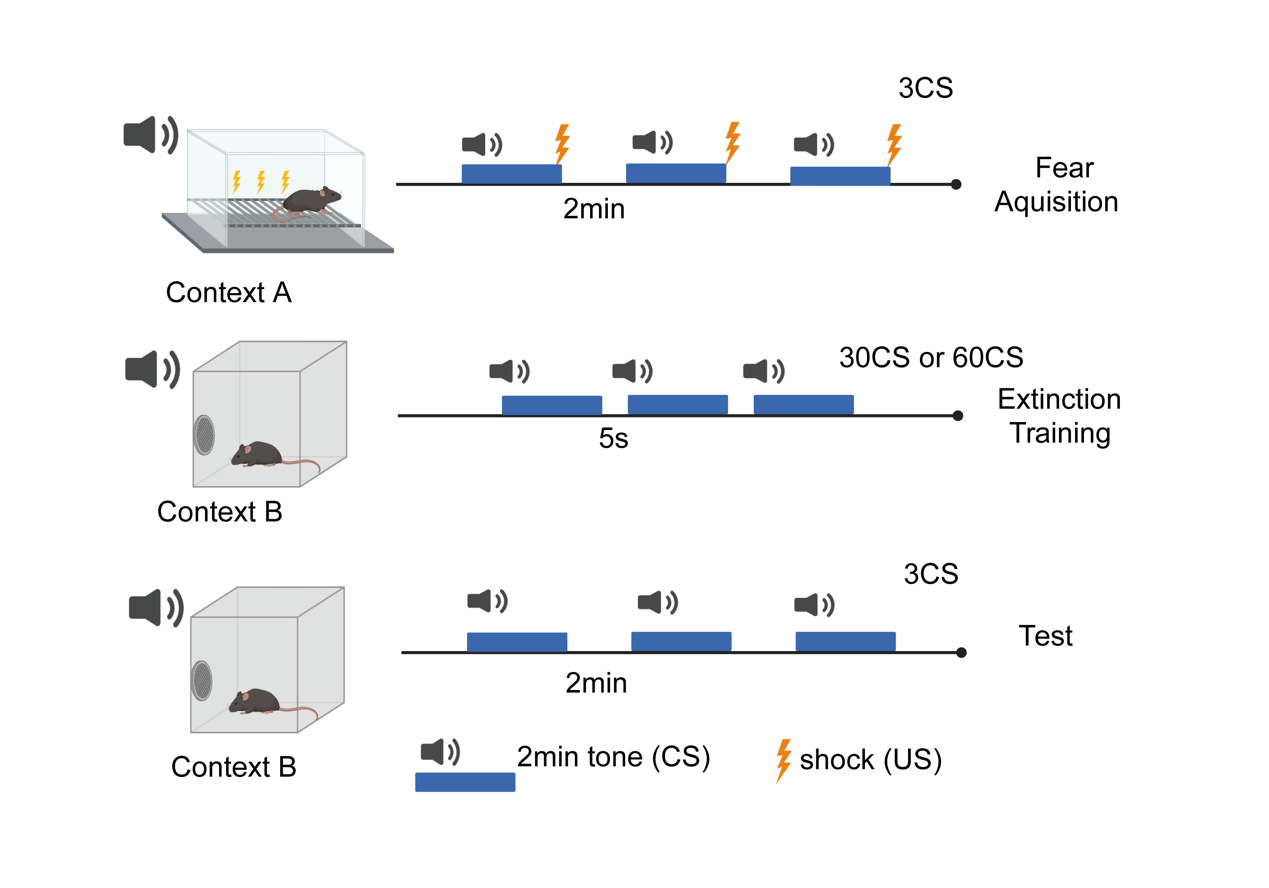


***Figure S1. Schematic of fear conditioning, extinction training, and test.***

Schematic of behavioral paradigm: mice underwent fear conditioning (CS–US pairings, Context A), extinction training (30–60 CS-alone trials, Context B), and extinction memory test the following day (3 CS-alone trials, Context B).


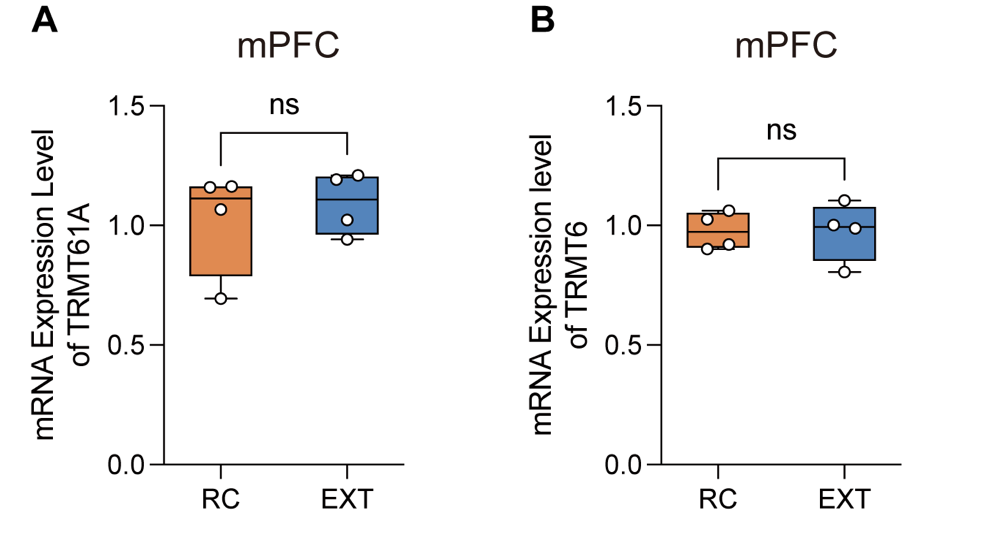


***Figure S2. TRMT6 and TRMT61A mRNA expression levels are unchanged in the mPFC following extinction training.*** **(A–B)** qPCR analysis of TRMT61A (A) and TRMT6 (B) mRNA levels in the medial prefrontal cortex (mPFC) of RC and EXT mice subjected to 60-CS extinction training. No significant differences were observed between groups (n = 4 mice per group; two-tailed unpairedt-test; for TRMT61A, t = 0.5469, df=6, *p*=0.6042, for TRMT6, t = 0.05313, df=6, *p*=0.9594).


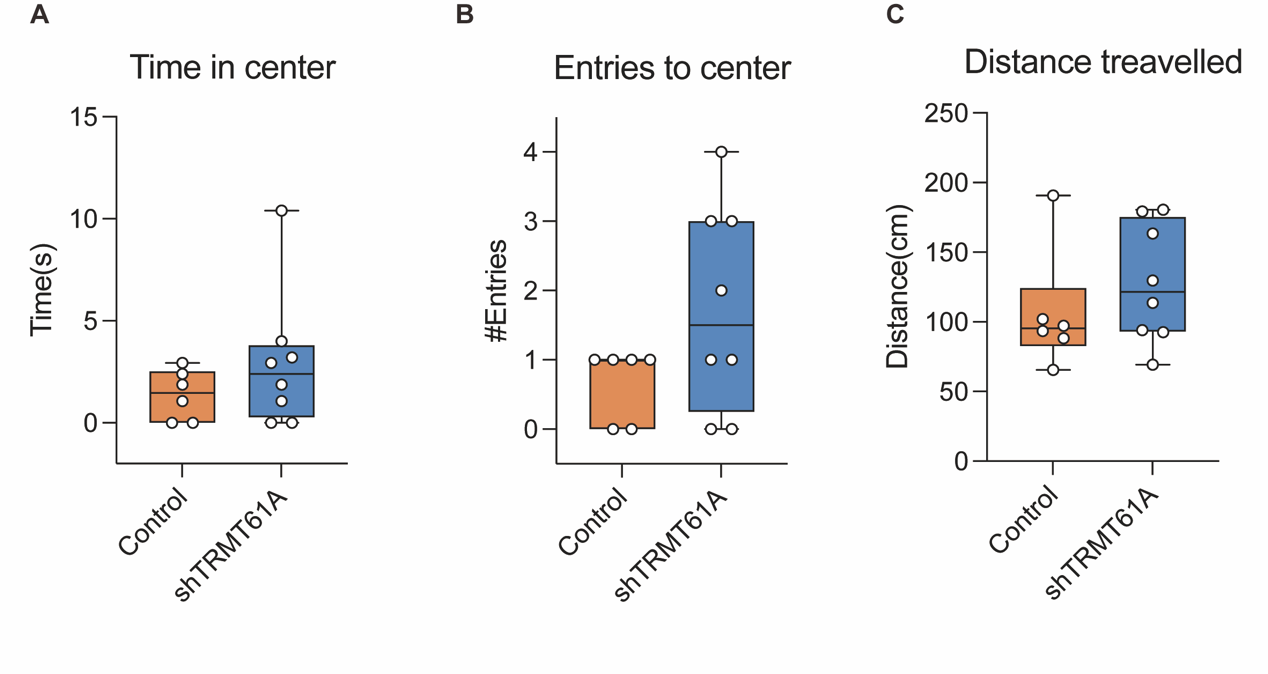


***Figure S3. No effects of TRMT61A knockdown on locomotor activity and anxiety-like behavior.***

**(A)** Time spent in the center (Two-tailed Mann-Whitney test, *p*=0.3613), **(B)** number of entries into the center (Two-tailed Mann-Whitney test, *p*=0.2524), and **(C)** total distance traveled during open field testing (unpaired two-tailed Mann-Whitney test, *p*=0.4136) showed no significant differences between control (*n*=6) and shTRMT61A groups (*n*=8), indicating that TRMT61A knockdown did not affect general locomotion or anxiety-like behavior.


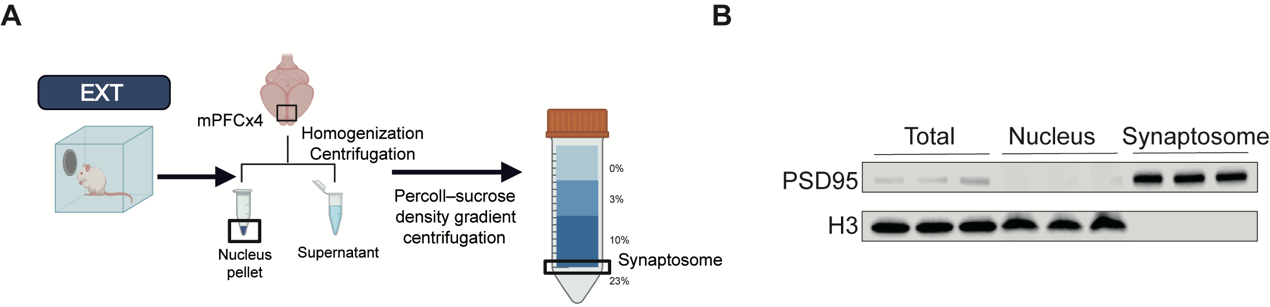


***Figure S4. Subcellular fractionation of mPFC tissue.* (A)** Schematic of the subcellular fractionation workflow. **(B)** Western blot validation of fraction purity. PSD95, a synaptic marker, was enriched in the synaptosome fraction, while histone H3, a nuclear marker, was detected predominantly in the nuclear fraction.


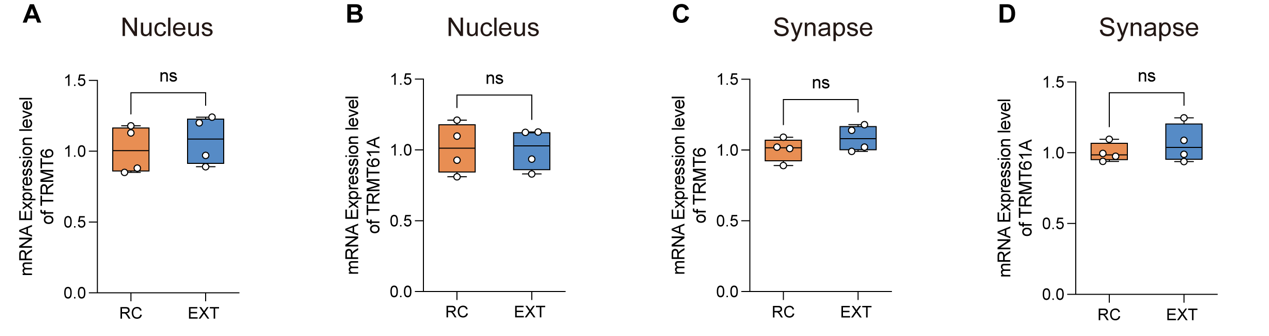


***Figure S5. TRMT6 and TRMT61A mRNA levels are unchanged in the nuclear and synaptic compartments of the mPFC following extinction training.***

**(A–B)** qPCR analysis of TRMT6 (A) (*n*=4, two-tailed unpaired Student’s t-test, t = 0.54, df = 6, *p*= 0.6087) and TRMT61A (B) (*n*=4, two-tailed unpaired Student’s t-test, t =0.06492, df = 6, *p*=0.9503) mRNA expression levels in nuclear fractions of the medial prefrontal cortex (mPFC) from RC and EXT mice. **(C–D)** qPCR analysis of TRMT6 (C) (*n*=4, two-tailed unpaired Student’s t-test, t =1.293, df = 6, *p*= 0.4326) and TRMT61A (D) (*n*=4, two-tailed unpaired Student’s t-test, t =0.8409, df = 6, *p*=0.4326) mRNA levels in synaptic fractions of the mPFC. No significant differences were observed between RC and EXT groups in either compartment.

***
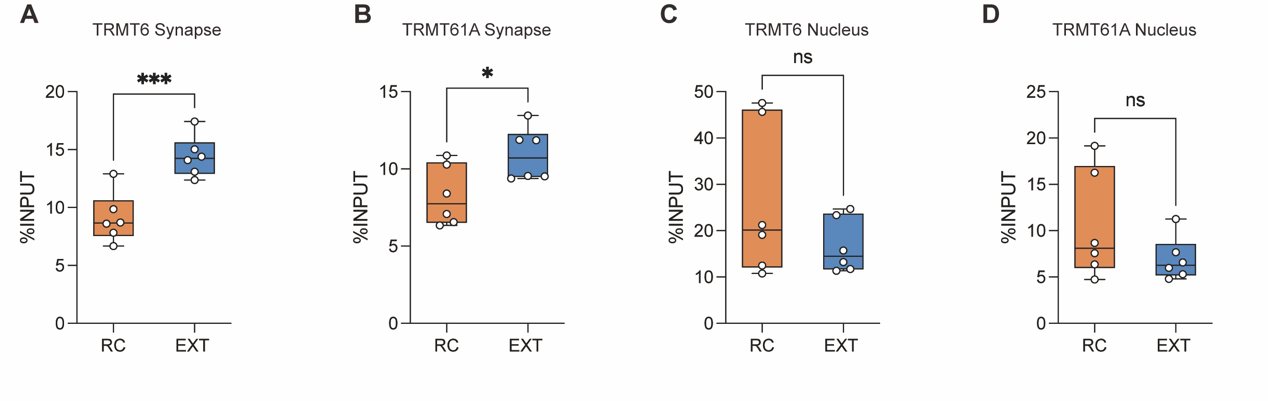
***

***Figure S6. Ribo IP-qPCR shows increased ribosome-associated TRMT6/61A transcripts in synaptic fractions after extinction, with no change in the nuclear fraction.***

(A, B) Ribo IP-qPCR shows increased ribosome-associated TRMT6 (A, two-tailed unpaired Student’s t-test, ****p*=0.0009) and TRMT61A (B, two-tailed unpaired Student’s t-test, **p* = 0.029) transcripts in synaptic fractions after EXT training. (C, D) No significant changes were observed for ribosome-associated TRMT6 (C, Welch’s t-test, *p* = 0.229) or TRMT61A (D, two-tailed unpaired Student’s t-test, *p* = 0.1991) in the nuclear fraction. *n*=6.


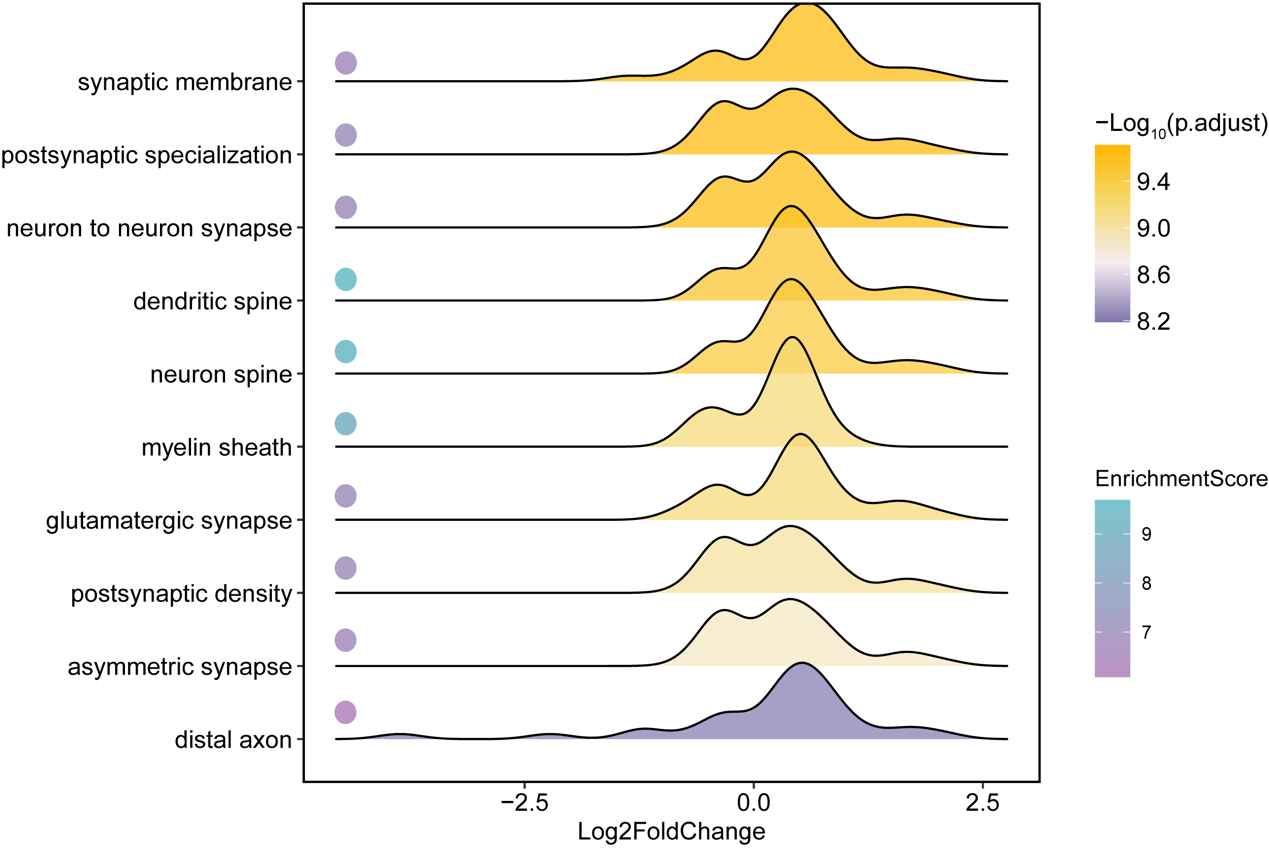


***Figure S7. Ridge plots showing m¹A enrichment profiles of representative transcripts from nuclear m¹A RIP-seq.*** Transcripts were selected based on GO terms enriched after extinction training, including RNA processing and chromatin regulation.


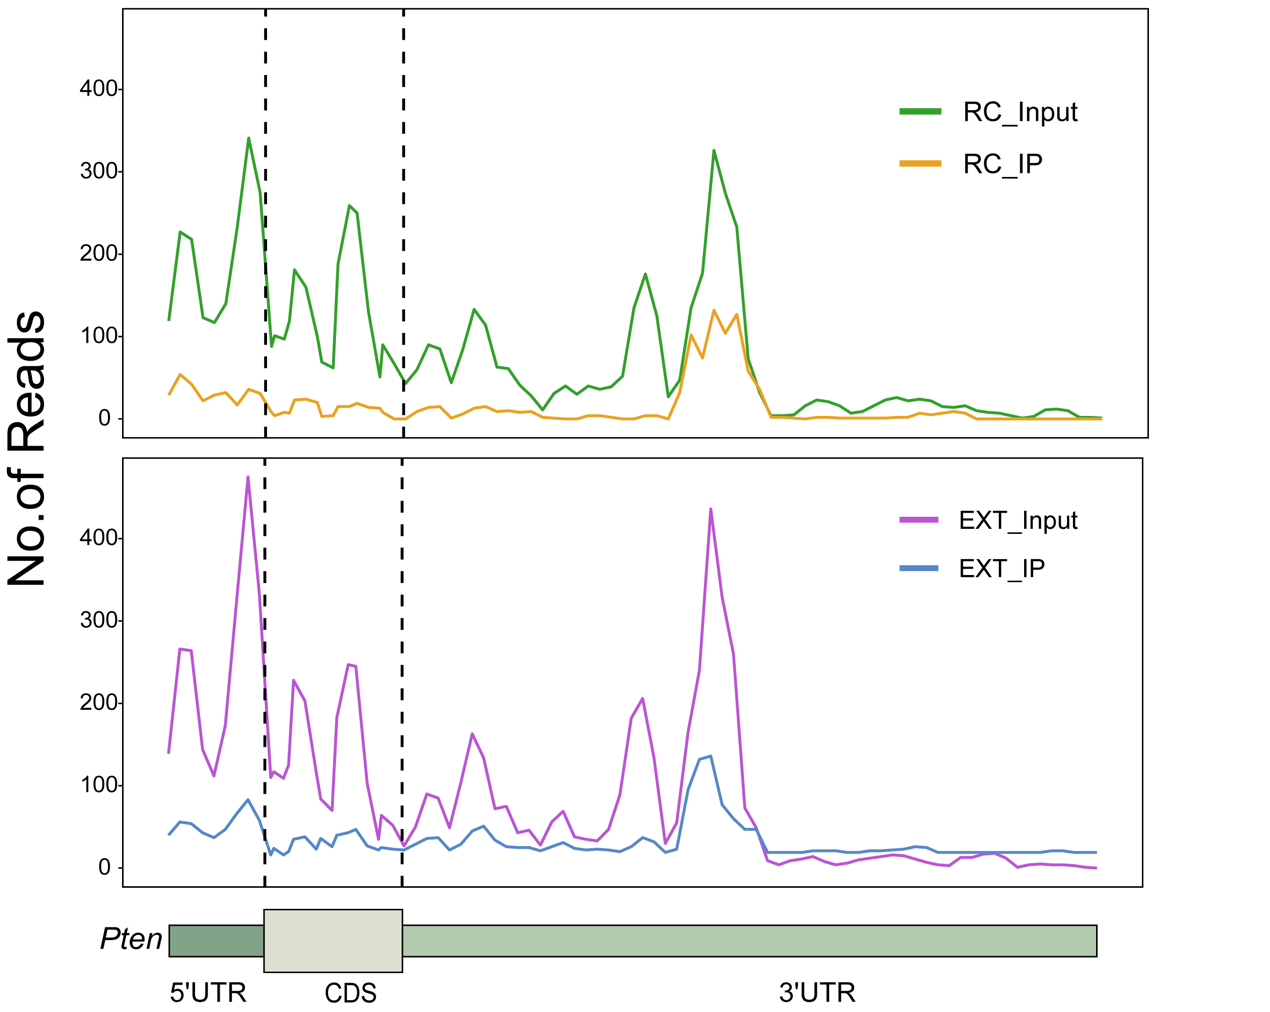


***Figure S8.******Nuclear m¹A-RIP-seq profiles of Pten mRNA in RC and EXT groups.***
Read density plots show IP and input signals aligned to the *Pten* transcript, with 5′ UTR, CDS, and 3′ UTR regions indicated. Dashed lines mark CDS boundaries.


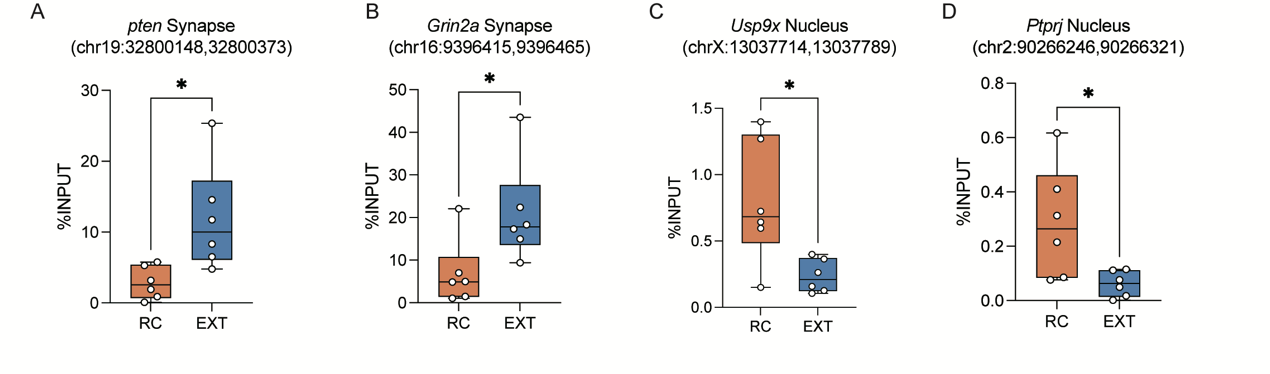


***Figure S9. m¹A RIP–qPCR validation of selected transcripts in synaptic and nuclear fractions of the mPFC.***

**(A–B)** Synapse. Increased m¹A enrichment after extinction for *Pten* (A; Welch’s t-test, *p* = 0.0164) and *Grin2a* (B; Mann–Whitney test, *p* = 0.026) compared with RC. **(C–D)** Nucleus. Reduced m¹A enrichment after extinction for *Usp9x* (C; Welch’s t-test, *p* = 0.0302) and *Ptprj* (D; Welch’s t-test, *p* = 0.0449) relative to RC (*n*=6).


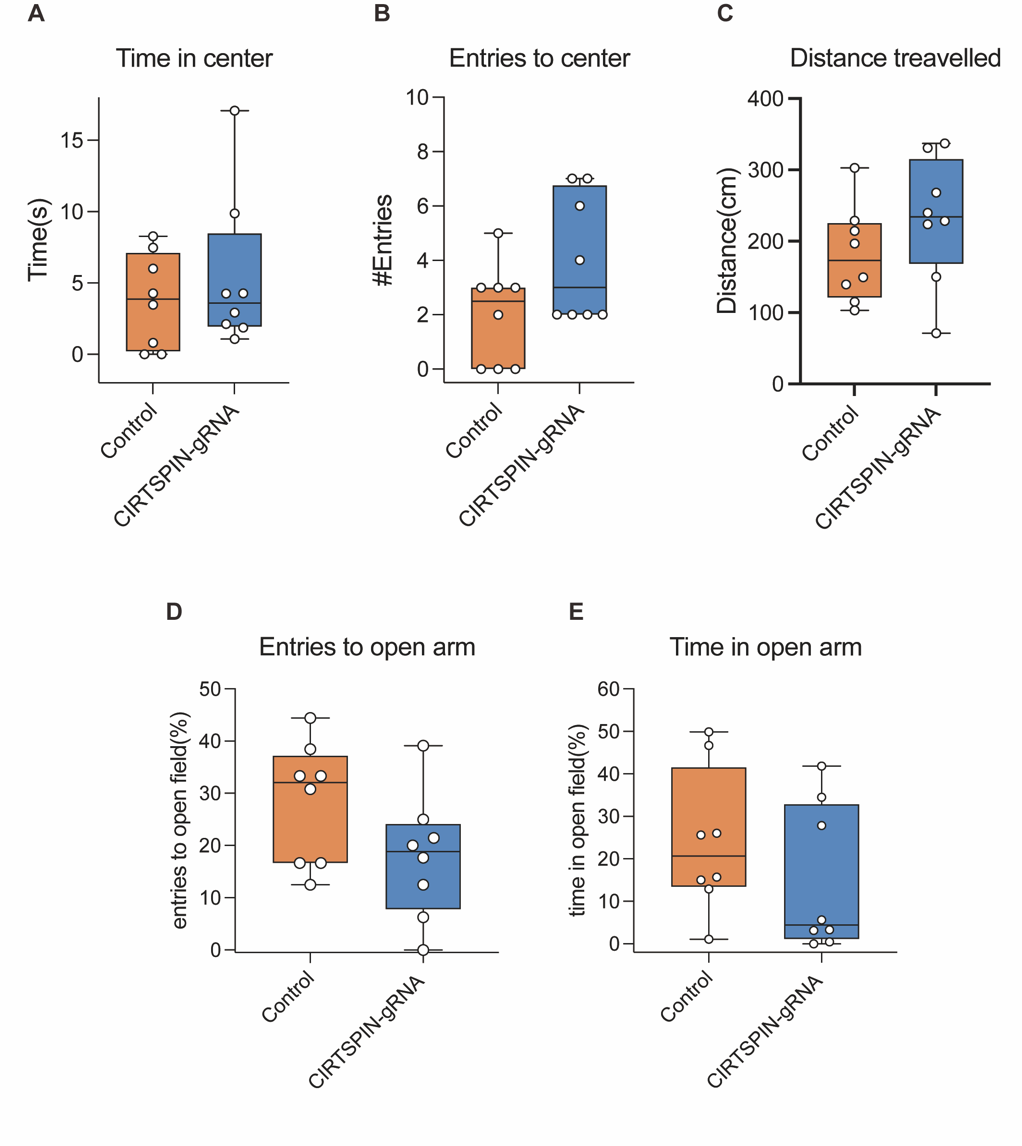


***Figure S10. Synaptic Pten knockdown does not affect locomotor activity or anxiety-like behavior.***

**(A–C)** Open field test: CIRTS-PIN-gRNA mice and control mice showed no significant differences in time spent in the center (A) (two-tailed Mann-Whitney test, *p*=0.6620), number of center entries (B) (two-tailed Mann-Whitney test, *p*=0.1798), or total distance traveled (C) (two-tailed unpaired Student’s t-test, t =1.261, df =14, *p*=0.2278). **(D–E)** Elevated plus maze: No significant differences were observed in the number of open arm entries (D) (two-tailed unpaired Student’s t-test, t =1.787, df =14, *p*=0.0957) and the time spent in open arms (E) (two-tailed Mann-Whitney test, *p*=0.2786) between groups(*n*=8).


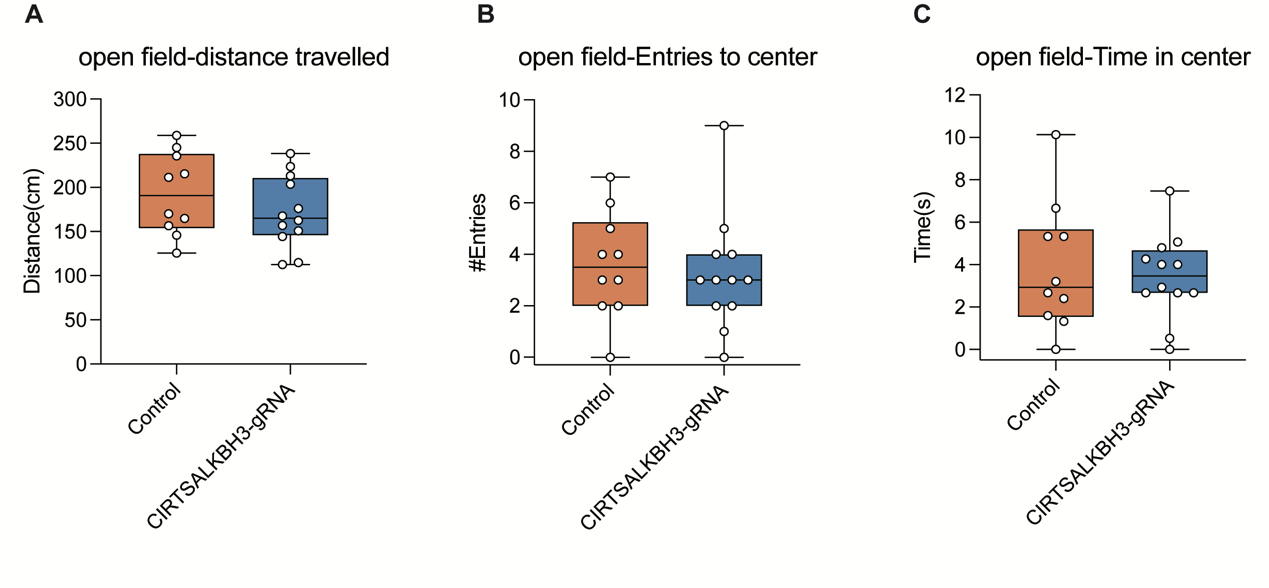


***Figure S11. No effects of Pten m1A demethylation on locomotor activity and anxiety-like behavior.*(A)** Total distance traveled (two-tailed unpaired Student’s t-test, t =1.132, df =20, *p*=0.2710), **(B)** number of entries into the center (two-tailed unpaired Student’s t-test, t =0.3758, df =20, *p*=0.7111), and **(C)** time spent in the center during open field testing (two-tailed unpaired Student’s t-test, t =0.4105, df =20, *p*=0.6858) showed no significant differences between control and shTRMT61A group, indicating that m1A demethylation on *Pten* did not affect general locomotion or anxiety-like behavior (Control group *n*=10, gRNA group *n*=12).


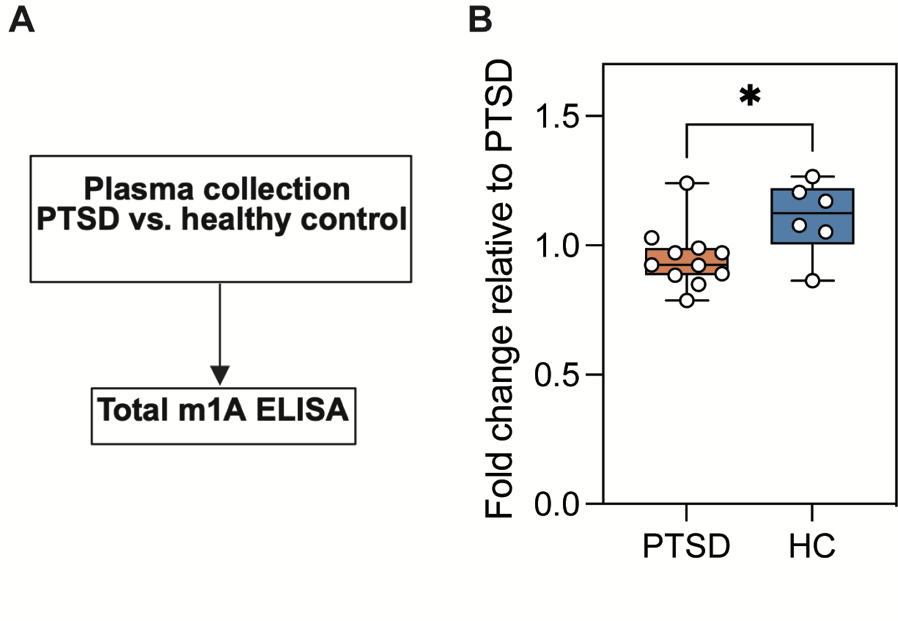


***Figure S12. Plasma m¹A levels are reduced in PTSD patients.*****(A)** Schematic of the experimental design. Peripheral blood plasma was collected from patients diagnosed with PTSD and matched healthy controls (HC), followed by quantification of total m¹A levels using ELISA. **(B)** Box plot showing total m¹A levels in plasma samples from healthy controls (HC) and PTSD patients. (HC group n=6, PTSD group n=11, two-tailed unpaired Student’s t-test, t =2.405, df=15, **p*=0.0295).

**Supplementary Table 1. List of primers used in this study**

| qPCR primers(5’ to 3’)： |  |
| --- | --- |
| TRMT61A-F | CGGTTCTGTGGTCTGTGAAT |
| TRMT61A-R | GTGGAACTCTACTGTGTGTAGG |
| ACTB-F | GGCTGTATTCCCCTCCATCG |
| ACTB-R | CCAGTTGGTAACAATGCCATGT |
| PGK1-F | TGCACGCTTCAAAAGCGCACG |
| PGK1-R | AAGTCCACCCTCATCACGACCC |
| RNA pull down oligo baits: |  |
| m1A-bait | 5’ Biotin-CCUGGGGG/m¹A/AGACCCAGC-3’ |
| A-bait(Control) | 5’ Biotin-CCUGGGGGAAGACCCAGC-3’ |
| m1A-RIP-qPCR: |  |
| Ptprj-F(chr2:90266246,90266321) | TAGCCGATGGAAATGCGTGA |
| Ptprj-R | AGAAACCCACGCAGAAGAGG |
| Grin2a-F(chr16:9396415,9396465) | CTCATGGTAAAGTGGCCTGAGT |
| Grin2a-R | GGCAGAACTCCACGCATTG |
| Usp9x-F(chrX:13037714,13037789) | AGCGACCTTTGACAGCAGAT |
| Usp9x-R | GGATCCCCAGGCTCCAAAAA |
| Pten-F(chr19:32800148,32800373) | CCCGTACATCCCAAGTCCTC |
| Pten-R | GATGCTGCCGGTAAACTCCA |
| shRNA and gRNA |  |
| shTRMT61A | GCTGTGGTTGAGCTAAATTAA |
| shScramble | GCACATTCTCTGATTAGTTAT |
| CIRTSPIN-gRNA | GTTAAATTTGGCGGTGTCATAATGTCTCTC |
| CIRTSPIN-NT | GATACATCATCTCTGTATTAGGCTCCCAAC |
| CIRTSALKBH3-gRNA | CCCGTTTAGTGCACAGATCCACCCCTTCCG |
| CIRTSALKBH4-NT | GATACATCATCTCTGTATTAGGCTCCCAAC |
